# Supplementary material
Source: Springer Nature journal article supplement (https://www.springermedizin.de/resource/supplementary/12911_2011_624_MOESM6_ESM.pdf/9525928)
Supplement: MOESM6 [file 9525928]

## ISSUE:

Language communication problem

## BACKGROUND

Some anesthetists are not from Malaysia

Some of the patients cannot speak English

## CURRENT CONDITION

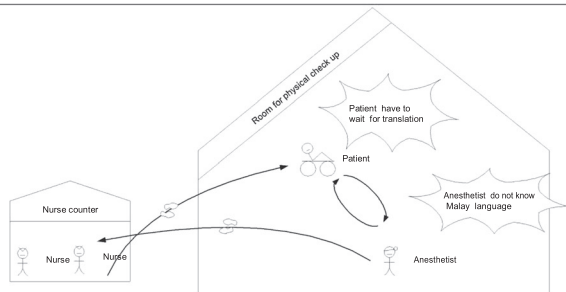

## PROBLEM ANALYSIS

1. Anesthetist do not know Malay language

Why? He or she is not from Malaysia

2. Patient needs translation to understand anesthetist comments

Why? Patient does not understand English

Why? The nurse is not available in the room to assist patient

Why? It is not defined in the process that when anesthetist comes to the room to visit patient, she should be there for assistance

## TARGET CONDITION

|      |                   |
|------|-------------------|
| TO   | Clinical Director |
| BY   | HOD anesthesia    |
| DATE | July 2011         |

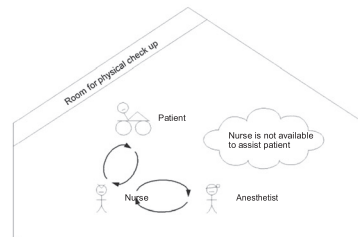

## COUNTERMEASURES

Number of time patient and anesthetist are ready but nurse is not available

## IMPLEMENTATION PLAN

| What                                    | Who | Duration | Outcome              |
|-----------------------------------------|-----|----------|----------------------|
| Inform nurses about new process of work | HOD | 0.5 Hour | Reduce waiting waste |

## FOLLOW UP

|                              |            |
|------------------------------|------------|
| Cost                         | \$\$\$     |
| Man/hour                     | \$\$\$     |
| Benefit                      | \$\$\$     |
| Reduce waste                 | Intangible |
| Improve time to patient care | Intangible |

## TEST

Monitor the new workflow and participant in new process

Monitor nurse attendance
